# Supplementary material for: Evaluating Accessibility in Sequential Onboarding Flows: A Conceptual Framework and Scoring Rubric
Source: Research Square preprint supplement (doi:10.21203/rs.3.rs-8795738/v1), 2026-02-18
Supplement: Supplementary file 1 [file dff2679954360e203622617a.pdf]

# **Supplementary Material: Evaluating Accessibility in Sequential Onboarding Flows: A Conceptual Framework and Scoring Rubric**

**Israel Umola Akeji\*** (ORCID iD: 0009-0004-7090-730X)

Department of Software Engineering, Miva Open University, Plot 1059 O.P. Fingesi Street, Utako, FCT Abuja, Nigeria  
Email: akejiisrael@gmail.com

**Daniel Elejo Okwoli**

Department of Computer Science, University of the People, 595 E. Colorado Blvd, Suite 623, Pasadena, CA 91101, USA  
Email: danielokwoli18@gmail.com

\*Corresponding author

## **Preface**

This supplementary file provides the supporting information used in the study “**Evaluating Accessibility in Sequential Onboarding Flows: A Conceptual Framework and Scoring Rubric**”. The information is included to support transparency, enable replication, and facilitate comparison with future studies.

The file contains:

1. Consent Form used to ensure voluntary participation and informed agreement.
2. **Participant Accessibility Evaluation Form** (Table S1), administered after onboarding completion.
3. **Extended Framework Checklist for Evaluators** (Table S2), used to structure expert review and document evidence for scoring.

4. **Accessibility Scoring Rubric** (Table S3), defining the standardised 0–5 scale applied consistently across expert and participant evaluations.
5. **De-identified Score Summaries** (Table S4), reporting participant ratings without personal identifiers.
6. **Coding Framework for Qualitative Analysis** (Table S5), showing thematic codes mapped to the four evaluation dimensions.

## 1. Consent Form for User Evaluation

Thank you for agreeing to participate in this study. This evaluation is part of a research project focused on improving accessibility in digital onboarding experiences.

Participation is voluntary, and participants may withdraw at any time without penalty. No personally identifiable information will be collected or published.

By signing below, participants acknowledge that they understand the purpose of the study and consent to participate.

Participant Name: \_\_\_\_\_

Signature: \_\_\_\_\_

Date: \_\_\_\_\_

## 2. Table S1: Participant Accessibility Evaluation Form

A participant-facing self-evaluation form based on the four framework dimensions (Perceivability, Operability, Understandability, and Personalisation). The form was administered after onboarding to collect structured ratings and optional observations.

| Framework Dimension   | Checklist Summary                                                                                                                                                                                                                                                         | Rate (0–5)                                                                                                                                                           | User Notes / Observations |
|-----------------------|---------------------------------------------------------------------------------------------------------------------------------------------------------------------------------------------------------------------------------------------------------------------------|----------------------------------------------------------------------------------------------------------------------------------------------------------------------|---------------------------|
| <b>Perceivability</b> | Is the content presented in a way all users can perceive (e.g., text alternatives, clear contrast)? Do screen readers interpret elements correctly? Are media elements captioned or transcribed? Are instructions conveyed through multiple modalities (not only colour)? | <input type="checkbox"/> 0 <input type="checkbox"/> 1 <input type="checkbox"/> 2 <input type="checkbox"/> 3<br><input type="checkbox"/> 4 <input type="checkbox"/> 5 |                           |
| <b>Operability</b>    |                                                                                                                                                                                                                                                                           | <input type="checkbox"/> 0 <input type="checkbox"/> 1 <input type="checkbox"/> 2 <input type="checkbox"/> 3<br><input type="checkbox"/> 4 <input type="checkbox"/> 5 |                           |

|                          |                                                                                                                                                                                                                                                                                |                                                                                                                                                                      |
|--------------------------|--------------------------------------------------------------------------------------------------------------------------------------------------------------------------------------------------------------------------------------------------------------------------------|----------------------------------------------------------------------------------------------------------------------------------------------------------------------|
|                          | Are interactive elements easy to use and navigate, including by keyboard or assistive technology? Are focus indicators clear and sequential? Are time limits adjustable or clearly communicated? Are gestures accessible through alternatives? Are error messages recoverable? |                                                                                                                                                                      |
| <b>Understandability</b> | Are instructions and flows easy to follow without cognitive overload?<br>Are error and confirmation messages understandable?                                                                                                                                                   | <input type="checkbox"/> 0 <input type="checkbox"/> 1 <input type="checkbox"/> 2 <input type="checkbox"/> 3<br><input type="checkbox"/> 4 <input type="checkbox"/> 5 |
| <b>Personalisation</b>   | Can participants adjust aspects of onboarding to suit their needs (e.g., skip/revisit steps, change font size, adjust pacing, alternative formats)?<br>Are preferences remembered across steps (where applicable)?                                                             | <input type="checkbox"/> 0 <input type="checkbox"/> 1 <input type="checkbox"/> 2 <input type="checkbox"/> 3<br><input type="checkbox"/> 4 <input type="checkbox"/> 5 |

**Rating Key:**

- 0 = Not supported at all
- 1 = Severely lacking
- 2 = Partially addressed
- 3 = Adequately addressed
- 4 = Strongly supported (minor gaps)
- 5 = Fully accessible and inclusive

**User Demographics (optional):**

Assistive Technology Used: \_\_\_\_\_  
 Impairment Type (optional): \_\_\_\_\_  
 Age Group:  Under 18  18–30  31–50  50+  
 Device/Platform: \_\_\_\_\_  
 Date: \_\_\_\_\_

**3. Table S2: Extended Framework Checklist for Evaluators**

An evaluator checklist used to structure expert review of onboarding flows. Checklist observations were used to justify dimension-level 0–5 rubric scores (see Table S3).

| <b>Dimension</b> | <b>Checklist Item</b> | <b>Evaluator Guidance</b> | <b>Evidence / Notes (to justify scoring)</b> |
|------------------|-----------------------|---------------------------|----------------------------------------------|
|------------------|-----------------------|---------------------------|----------------------------------------------|

|                          |                                                 |                                              |
|--------------------------|-------------------------------------------------|----------------------------------------------|
| <b>Perceivability</b>    | Images have descriptive alt text                | Use screen reader to verify text equivalents |
| <b>Perceivability</b>    | Text has sufficient contrast                    | WCAG contrast checker recommended            |
| <b>Perceivability</b>    | Audio/video content has captions or transcripts | Mandatory for onboarding videos              |
| <b>Operability</b>       | All functionality is accessible via keyboard    | Test tab order and focus behaviour           |
| <b>Operability</b>       | Buttons and inputs are large and selectable     | Consider touch-target size and spacing       |
| <b>Operability</b>       | No time limits that hinder interaction          | Warn or allow extension if needed            |
| <b>Understandability</b> | Language is simple and clear                    | Avoid jargon; use plain instructions         |
| <b>Understandability</b> | Onboarding steps are logically ordered          | Evaluate cognitive load and transitions      |
| <b>Understandability</b> | Progress indicators are present                 | Include visual or textual cues               |
| <b>Personalisation</b>   | Users can skip, repeat, or extend steps         | Optional customization improves inclusivity  |
| <b>Personalisation</b>   | Content adapts to user roles or needs           | Evaluate tailoring based on context          |
| <b>Personalisation</b>   | Accessibility preferences are respected         | Check system/browser-level settings          |

#### 4. Table S3: Accessibility Scoring Rubric (0–5 Scale)

Standardised rating anchors applied consistently across dimensions in both expert and participant evaluations. Ratings reflect the extent to which onboarding supported each dimension, informed by checklist evidence (Table S2) or participant experience reports (Table S1).

| <b>Score</b> | <b>Interpretation</b>                                  |
|--------------|--------------------------------------------------------|
| <b>0</b>     | No support; major barriers prevent access              |
| <b>1</b>     | Severe lacking; critical gaps consistently affect use  |
| <b>2</b>     | Limited support; multiple accessibility issues present |

|   |                                                           |
|---|-----------------------------------------------------------|
| 3 | Adequate support; partial accessibility with notable gaps |
| 4 | Strong support; minor issues remain                       |
| 5 | Fully supported; aligns with accessibility best practices |

## 5. Table S4: De-identified Score Summaries

Participant scores across the four dimensions (0–5), reported without personal identifiers.

| Participant    | Perceivability | Operability | Understandability | Personalisation | Notes (selected anonymised rationale) |
|----------------|----------------|-------------|-------------------|-----------------|---------------------------------------|
| P1             | 4              | 1           | 4                 | 4               | Onboarding video has no caption       |
| P2             | 3              | 4           | 3                 | 3               | No clear navigation                   |
| P3             | 3              | 2           | 1                 | 2               | Lack of visual scaffolding            |
| P4             | 3              | 4           | 3                 | 2               | Fixed flow throughout                 |
| <b>Average</b> | <b>3.25</b>    | <b>2.75</b> | <b>2.75</b>       | <b>2.75</b>     |                                       |

## 6. Table S5: Coding Framework for Qualitative Analysis

Thematic coding categories used to analyse qualitative participant observations. Codes were mapped to the four dimensions.

| Dimension             | Thematic Codes                                         | Example Quotes (selected anonymised)         |
|-----------------------|--------------------------------------------------------|----------------------------------------------|
| <b>Perceivability</b> | Contrast issues; missing text alternatives             | “Text blended into background; hard to see.” |
| <b>Operability</b>    | Gesture reliance; navigation difficulty; small targets | “Swipe-only was exhausting.”                 |

---

|                          |                                                                       |                                                                              |
|--------------------------|-----------------------------------------------------------------------|------------------------------------------------------------------------------|
| <b>Understandability</b> | Return/back uncertainty; unclear flow structure                       | “Was not sure on how to return back.”                                        |
| <b>Personalisation</b>   | Limited customisation; assistive-technology configuration constraints | “No adjustable font size, and my accessibility settings were not supported.” |

---
